# Supplementary material for: Aromatic trails: persistence and interplay between linked spherical aromatic dicarboranes in dimer to hexamer linear arrays
Source: Royal Society of Chemistry journal article supplement (doi:10.1039/d4cp03930k), 2025-01-01
Supplement: d4cp03930k1.pdf [file d4cp03930k1.pdf]

# Aromatic Trails. Persistence and Interplay Between Linked Spherical Aromatic Dicarboranes in Dimer to Hexamer Linear Arrays

Alvaro Muñoz-Castro\*

Facultad de Ingeniería, Arquitectura y Diseño, Universidad San Sebastián, Bellavista 7,  
Santiago, 8420524, Chile.

## Content

Table S1. Geometrical parameters for the studied species.

Page S2

Figure S1. Schematic representation of *para*-[C<sub>2</sub>B<sub>10</sub>H<sub>10</sub>] (**1**), and related dimer (**2**),  
trimer (**3**), tetramer (**4**), pentamer (**5**), and hexamer (**6**) arrays.

Page S3

Figure S2. Isosurface representation (0.01 e/bohr<sup>3</sup>) for *para*-[C<sub>2</sub>B<sub>10</sub>H<sub>10</sub>] (**1**), and related  
dimer (**2**), trimer (**3**), tetramer (**4**), pentamer (**5**), and hexamer (**6**) arrays.

Page S4

Figure S2. Schematic representation of calculated <sup>11</sup>B- and <sup>13</sup>C-NMR values in the  
studied linear oligomers.

Page S5

Figure S3. Contour plot representation of **B<sub>x</sub><sup>ind</sup>**, denoting the common shielding region  
of about -5.0 ppm (light blue) between parallel shielding cones.

Page S5

Figure S4. Isosurface for localized-orbital locator (LOL) of the studied species. Isovalue  
set to 0.55.

Page S6

Table S2. Coordinates for the studied species in MultipleXYZ format. Values in  
Angstroms.

Page S7

Table S1. Geometrical parameters for the studied species. HOMO-LUMO and VDE values in eV. Unique C-C distances in Angstrom, from central (C-C), to external (C-C', C-C'') bonds.

|          | HOMO-LUMO | VDE   |  | C-C   | C-C'  | C-C'' |
|----------|-----------|-------|--|-------|-------|-------|
| <b>1</b> | 9.016     | 10.29 |  |       |       |       |
| <b>2</b> | 8.447     | 9.75  |  | 1.529 |       |       |
| <b>3</b> | 8.248     | 9.42  |  | 1.529 |       |       |
| <b>4</b> | 8.155     | 9.28  |  | 1.527 | 1.528 |       |
| <b>5</b> | 8.083     | 9.15  |  | 1.526 | 1.526 |       |
| <b>6</b> | 8.056     | 9.05  |  | 1.522 | 1.530 | 1.526 |

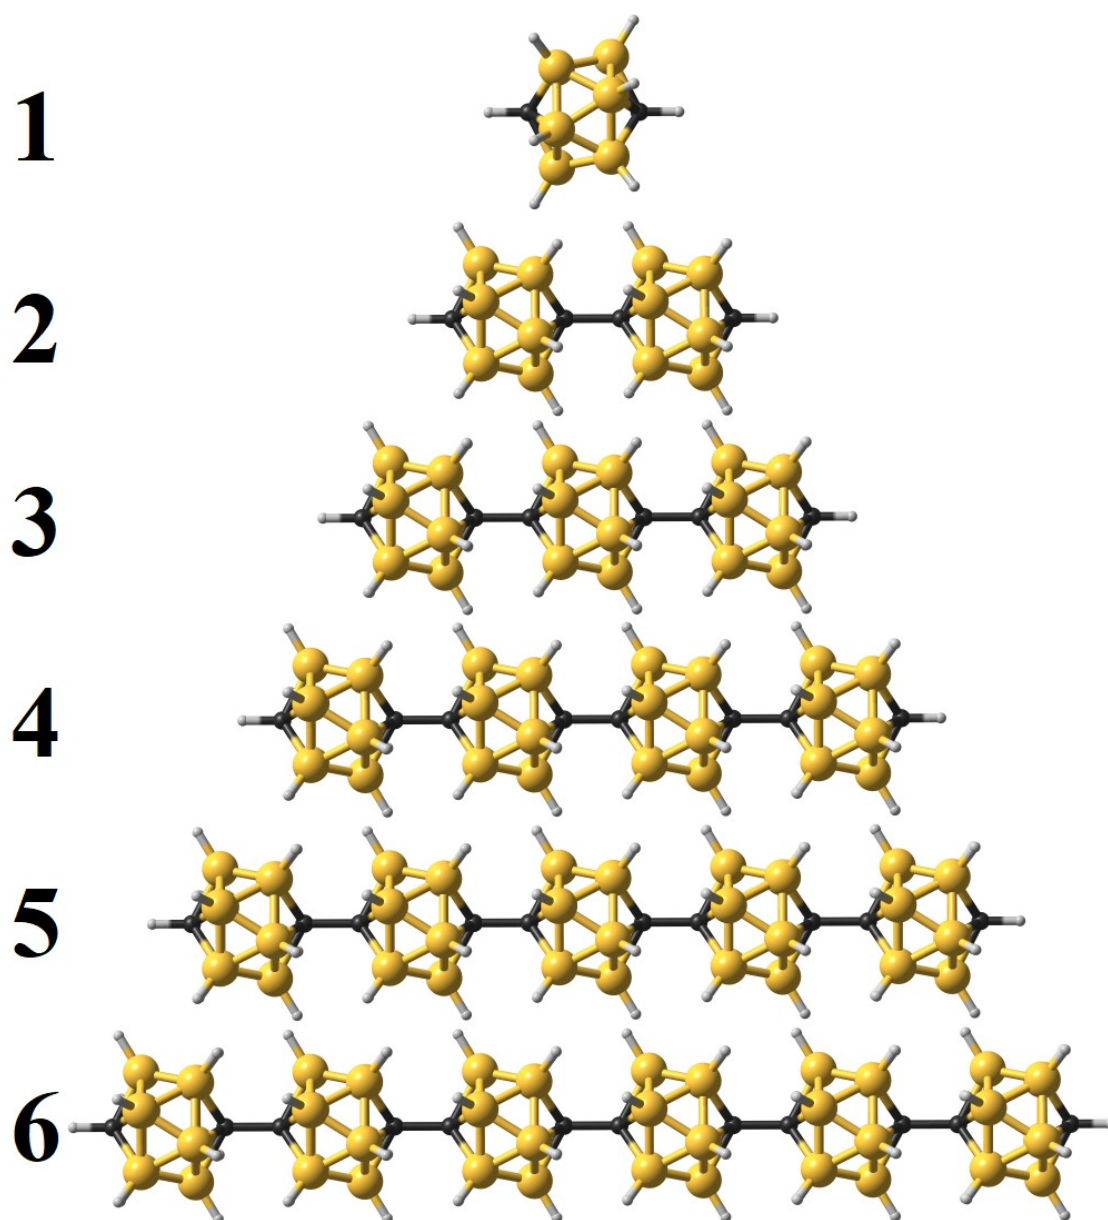

Figure S1. Schematic representation of *para*-[C<sub>2</sub>B<sub>10</sub>H<sub>10</sub>] (1), and related dimer (2), trimer (3), tetramer (4), pentamer (5), and hexamer (6) arrays.

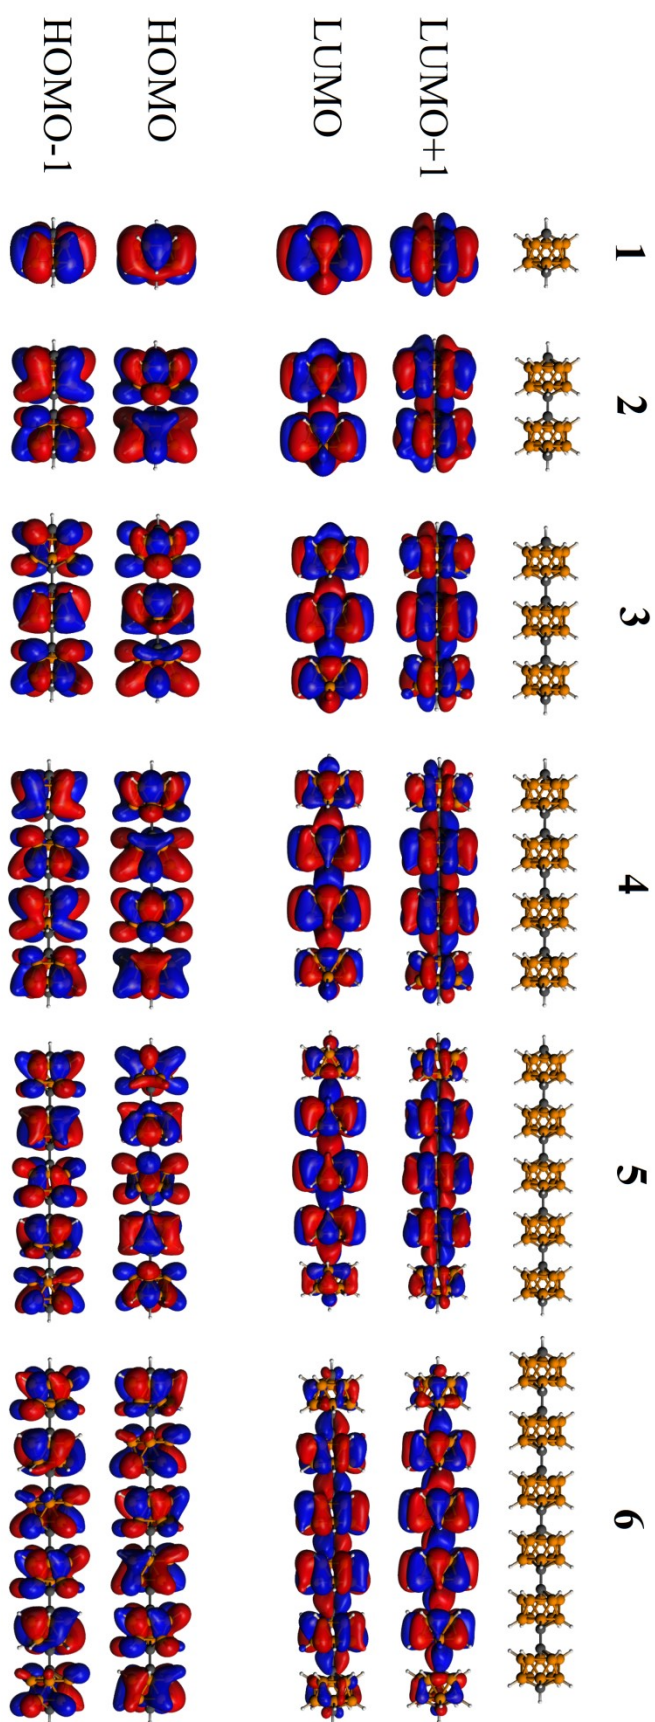

Figure S2. Isosurface representation ( $0.01 \text{ e}/\text{bohr}^3$ ) for *para*-[C<sub>2</sub>B<sub>10</sub>H<sub>10</sub>] (**1**), and related dimer (**2**), trimer (**3**), tetramer (**4**), pentamer (**5**), and hexamer (**6**) arrays.

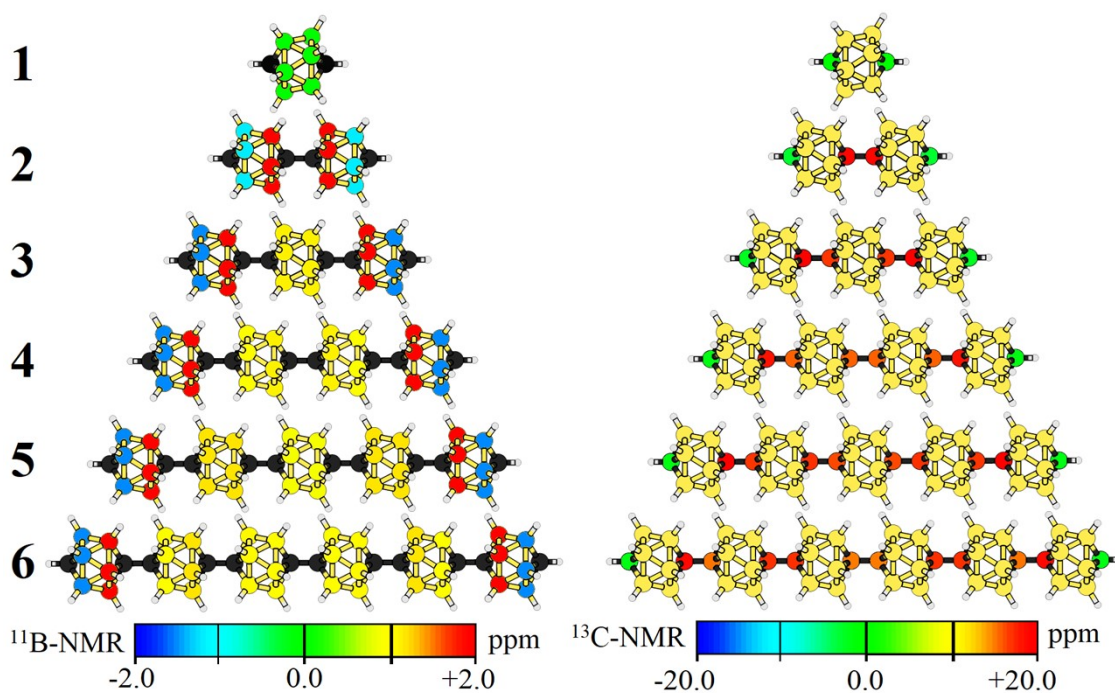

Figure S2. Schematic representation of calculated  $^{11}\text{B}$ - and  $^{13}\text{C}$ -NMR values in the studied linear oligomers.

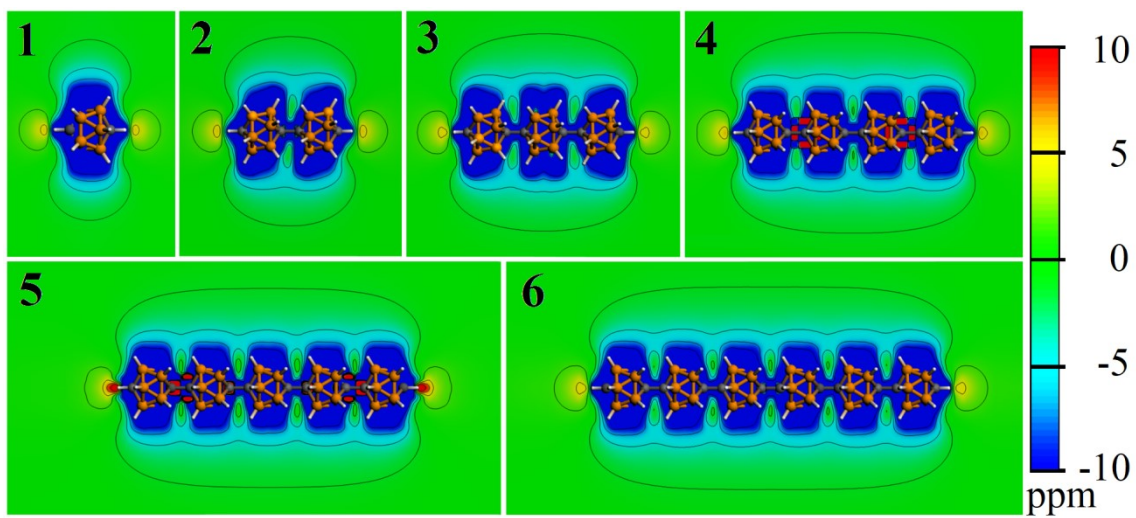

Figure S3. Contour plot representation of  $B_x^{\text{ind}}$ , denoting the common shielding region of about -5.0 ppm (light blue) between parallel shielding cones.

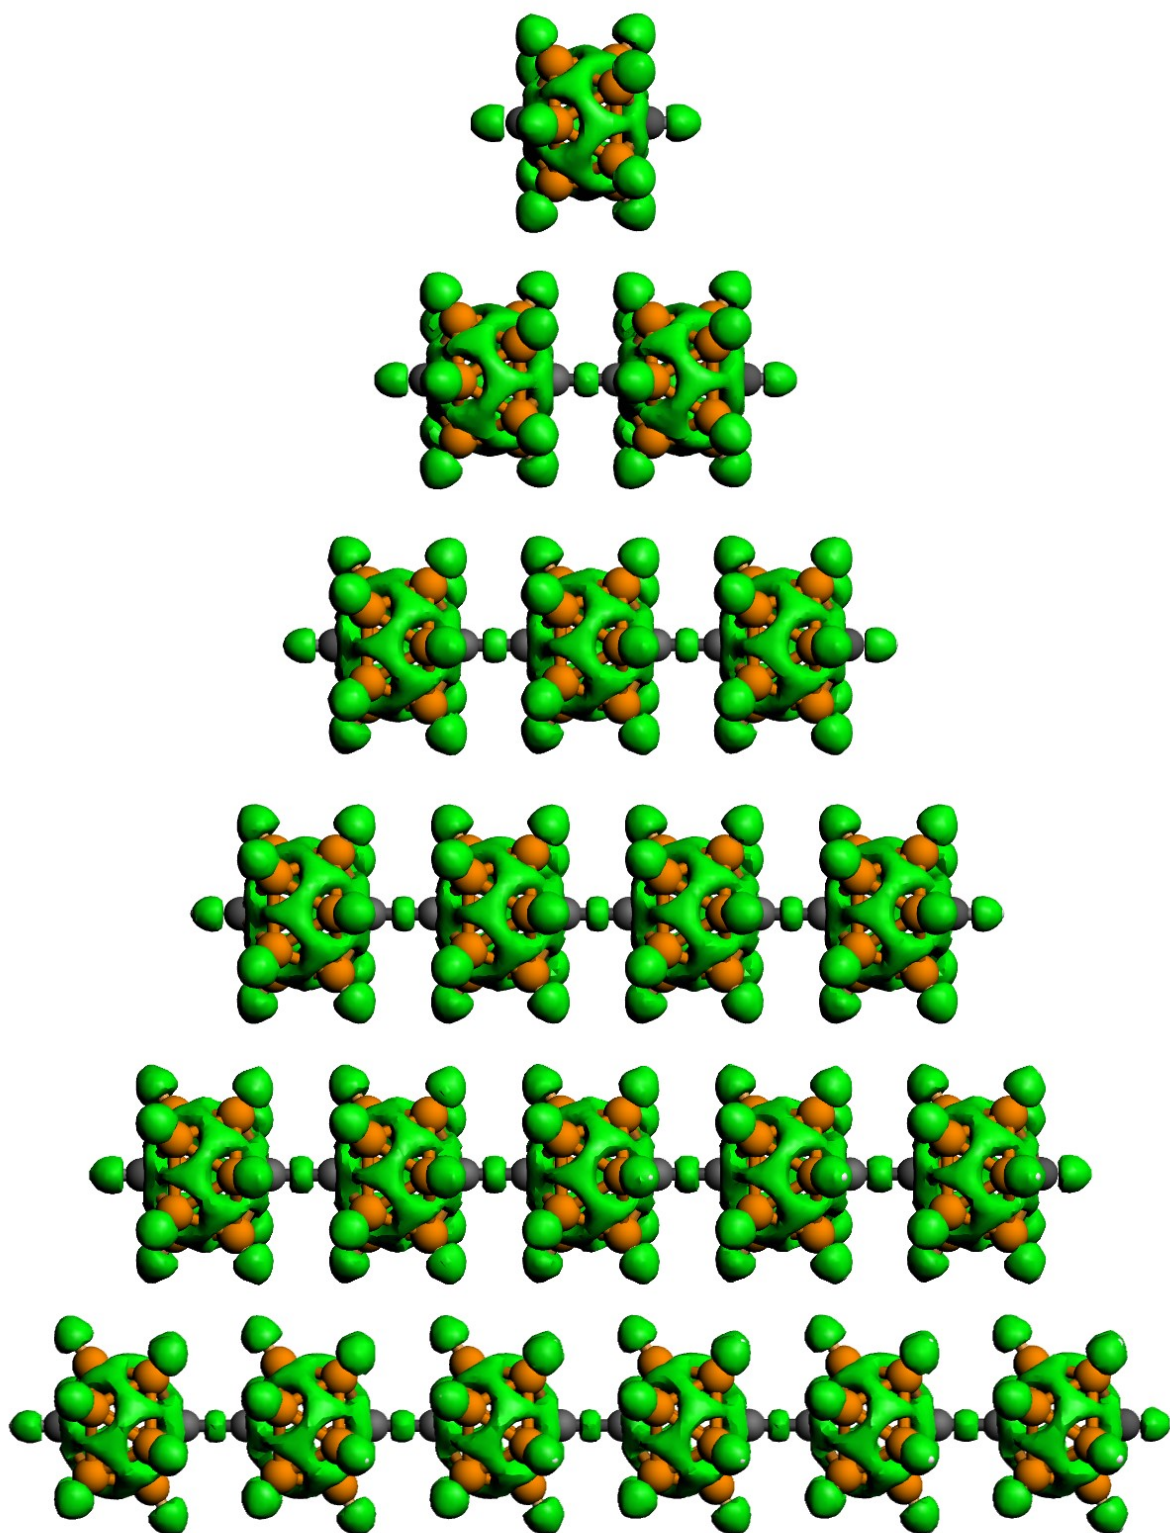

Figure S4. Isosurface for localized-orbital locator (LOL) of the studied species. Isovalue set to 0.55.

Table S2. Coordinates for the studied species in MultipleXYZ format. Values in Angstroms.

|    |              |              |             |
|----|--------------|--------------|-------------|
| 24 |              |              |             |
| 1  | B10C2H12     |              |             |
| C  | 0.000000000  | 0.000000000  | 5.488129000 |
| B  | 1.514504000  | 0.000000000  | 6.266807000 |
| B  | 0.468008000  | 1.440379000  | 6.266807000 |
| B  | -1.225260000 | 0.890203000  | 6.266807000 |
| B  | -1.225260000 | -0.890203000 | 6.266807000 |
| B  | 0.468008000  | -1.440379000 | 6.266807000 |
| B  | 1.225491000  | -0.890372000 | 7.762740000 |
| B  | 1.225491000  | 0.890372000  | 7.762740000 |
| H  | 2.524374000  | 0.000000000  | 5.642197000 |
| B  | -0.468096000 | 1.440651000  | 7.762740000 |
| H  | 0.780074000  | 2.400822000  | 5.642197000 |
| B  | -1.514791000 | 0.000000000  | 7.762740000 |
| H  | -2.042262000 | 1.483790000  | 5.642197000 |
| B  | -0.468096000 | -1.440651000 | 7.762740000 |
| H  | -2.042262000 | -1.483790000 | 5.642197000 |
| H  | 0.780074000  | -2.400822000 | 5.642197000 |
| C  | 0.000000000  | 0.000000000  | 8.541187000 |
| H  | 2.042029000  | -1.483621000 | 8.381727000 |
| H  | 2.042029000  | 1.483621000  | 8.381727000 |
| H  | -0.779986000 | 2.400549000  | 8.381727000 |
| H  | -2.524087000 | 0.000000000  | 8.381727000 |
| H  | -0.779986000 | -2.400549000 | 8.381727000 |
| H  | 0.000000000  | 0.000000000  | 9.627312000 |
| H  | 0.000000000  | 0.000000000  | 4.402122000 |
| 46 |              |              |             |
| 2  | B20C4H22     |              |             |
| C  | 0.000000000  | 0.000000000  | 0.812551000 |
| B  | 1.509290000  | 0.000000000  | 1.600033000 |
| B  | 0.466396000  | 1.435420000  | 1.600033000 |
| B  | -1.221041000 | 0.887138000  | 1.600033000 |
| B  | -1.221041000 | -0.887138000 | 1.600033000 |
| B  | 0.466396000  | -1.435420000 | 1.600033000 |
| B  | 1.222399000  | -0.888125000 | 3.087621000 |
| B  | 1.222399000  | 0.888125000  | 3.087621000 |
| H  | 2.525773000  | 0.000000000  | 0.981428000 |
| B  | -0.466915000 | 1.437016000  | 3.087621000 |
| H  | 0.780507000  | 2.402153000  | 0.981428000 |
| B  | -1.510968000 | 0.000000000  | 3.087621000 |
| H  | -2.043393000 | 1.484612000  | 0.981428000 |
| B  | -0.466915000 | -1.437016000 | 3.087621000 |
| H  | -2.043393000 | -1.484612000 | 0.981428000 |
| H  | 0.780507000  | -2.402153000 | 0.981428000 |
| C  | 0.000000000  | 0.000000000  | 3.906715000 |
| H  | 2.047044000  | -1.487265000 | 3.697052000 |
| H  | 2.047044000  | 1.487265000  | 3.697052000 |
| H  | -0.781901000 | 2.406445000  | 3.697052000 |
| H  | -2.530286000 | 0.000000000  | 3.697052000 |
| H  | -0.781901000 | -2.406445000 | 3.697052000 |
| C  | 0.000000000  | 0.000000000  | 5.436122000 |
| B  | 1.510309000  | 0.000000000  | 6.256224000 |
| B  | 0.466711000  | 1.436389000  | 6.256224000 |
| B  | -1.221866000 | 0.887737000  | 6.256224000 |
| B  | -1.221866000 | -0.887737000 | 6.256224000 |
| B  | 0.466711000  | -1.436389000 | 6.256224000 |
| B  | 1.218924000  | -0.885600000 | 7.747970000 |
| B  | 1.218924000  | 0.885600000  | 7.747970000 |
| H  | 2.532440000  | 0.000000000  | 5.657106000 |
| B  | -0.465588000 | 1.432932000  | 7.747970000 |
| H  | 0.782567000  | 2.408494000  | 5.657106000 |
| B  | -1.506673000 | 0.000000000  | 7.747970000 |
| H  | -2.048787000 | 1.488531000  | 5.657106000 |
| B  | -0.465588000 | -1.432932000 | 7.747970000 |

|            |              |              |              |
|------------|--------------|--------------|--------------|
| H          | -2.048787000 | -1.488531000 | 5.657106000  |
| H          | 0.782567000  | -2.408494000 | 5.657106000  |
| C          | 0.000000000  | 0.000000000  | 8.537421000  |
| H          | 2.047304000  | -1.487454000 | 8.354787000  |
| H          | 2.047304000  | 1.487454000  | 8.354787000  |
| H          | -0.782001000 | 2.406751000  | 8.354787000  |
| H          | -2.530607000 | 0.000000000  | 8.354787000  |
| H          | -0.782001000 | -2.406751000 | 8.354787000  |
| H          | 0.000000000  | 0.000000000  | 9.623825000  |
| H          | 0.000000000  | 0.000000000  | -0.273680000 |
| 68         |              |              |              |
| 3 B30C6H32 |              |              |              |
| C          | 0.000000000  | 0.000000000  | -3.849360000 |
| B          | -1.220787000 | 0.886954000  | -3.063186000 |
| B          | -1.220787000 | -0.886954000 | -3.063186000 |
| B          | 0.466299000  | -1.435121000 | -3.063186000 |
| B          | 1.508976000  | 0.000000000  | -3.063186000 |
| B          | 0.466299000  | 1.435121000  | -3.063186000 |
| B          | -1.512086000 | 0.000000000  | -1.575168000 |
| B          | -0.467260000 | -1.438079000 | -1.575168000 |
| B          | 1.223303000  | -0.888782000 | -1.575168000 |
| B          | 1.223303000  | 0.888782000  | -1.575168000 |
| B          | -0.467260000 | 1.438079000  | -1.575168000 |
| C          | 0.000000000  | 0.000000000  | -0.755066000 |
| H          | -2.045062000 | 1.485824000  | -3.677241000 |
| H          | -2.045062000 | -1.485824000 | -3.677241000 |
| H          | 0.781144000  | -2.404114000 | -3.677241000 |
| H          | 2.527835000  | 0.000000000  | -3.677241000 |
| H          | 0.781144000  | 2.404114000  | -3.677241000 |
| H          | -2.529016000 | 0.000000000  | -0.962025000 |
| H          | -0.781509000 | -2.405237000 | -0.962025000 |
| H          | 2.046017000  | -1.486518000 | -0.962025000 |
| H          | 2.046017000  | 1.486518000  | -0.962025000 |
| H          | -0.781509000 | 2.405237000  | -0.962025000 |
| C          | 0.000000000  | 0.000000000  | 0.774107000  |
| B          | 1.509704000  | 0.000000000  | 1.595492000  |
| B          | 0.466524000  | 1.435814000  | 1.595492000  |
| B          | -1.221376000 | 0.887382000  | 1.595492000  |
| B          | -1.221376000 | -0.887382000 | 1.595492000  |
| B          | 0.466524000  | -1.435814000 | 1.595492000  |
| B          | 1.220816000  | -0.886975000 | 3.080796000  |
| B          | 1.220816000  | 0.886975000  | 3.080796000  |
| H          | 2.528558000  | 0.000000000  | 0.985226000  |
| B          | -0.466310000 | 1.435156000  | 3.080796000  |
| H          | 0.781367000  | 2.404802000  | 0.985226000  |
| B          | -1.509012000 | 0.000000000  | 3.080796000  |
| H          | -2.045647000 | 1.486249000  | 0.985226000  |
| B          | -0.466310000 | -1.435156000 | 3.080796000  |
| H          | -2.045647000 | -1.486249000 | 0.985226000  |
| H          | 0.781367000  | -2.404802000 | 0.985226000  |
| C          | 0.000000000  | 0.000000000  | 3.900668000  |
| H          | 2.046190000  | -1.486644000 | 3.688117000  |
| H          | 2.046190000  | 1.486644000  | 3.688117000  |
| H          | -0.781575000 | 2.405441000  | 3.688117000  |
| H          | -2.529230000 | 0.000000000  | 3.688117000  |
| H          | -0.781575000 | -2.405441000 | 3.688117000  |
| C          | 0.000000000  | 0.000000000  | 5.429309000  |
| B          | 1.510712000  | 0.000000000  | 6.248328000  |
| B          | 0.466836000  | 1.436772000  | 6.248328000  |
| B          | -1.222192000 | 0.887974000  | 6.248328000  |
| B          | -1.222192000 | -0.887974000 | 6.248328000  |
| B          | 0.466836000  | -1.436772000 | 6.248328000  |
| B          | 1.219636000  | -0.886118000 | 7.739905000  |
| B          | 1.219636000  | 0.886118000  | 7.739905000  |
| H          | 2.530725000  | 0.000000000  | 5.646026000  |
| B          | -0.465860000 | 1.433769000  | 7.739905000  |
| H          | 0.782037000  | 2.406863000  | 5.646026000  |
| B          | -1.507554000 | 0.000000000  | 7.739905000  |



|            |              |              |              |
|------------|--------------|--------------|--------------|
| H          | -2.047400000 | 1.487523000  | 5.646026000  |
| B          | -0.465860000 | -1.433769000 | 7.739905000  |
| H          | -2.047400000 | -1.487523000 | 5.646026000  |
| H          | 0.782037000  | -2.406863000 | 5.646026000  |
| C          | 0.000000000  | 0.000000000  | 8.526746000  |
| H          | 2.047406000  | -1.487528000 | 8.347978000  |
| H          | 2.047406000  | 1.487528000  | 8.347978000  |
| H          | -0.782040000 | 2.406871000  | 8.347978000  |
| H          | -2.530734000 | 0.000000000  | 8.347978000  |
| H          | -0.782040000 | -2.406871000 | 8.347978000  |
| H          | 0.000000000  | 0.000000000  | 9.613122000  |
| H          | 0.000000000  | 0.000000000  | -4.935649000 |
| 90         |              |              |              |
| 4 B40C8H42 |              |              |              |
| C          | 0.000000000  | 0.000000000  | -8.513608000 |
| B          | -1.433323000 | 0.465715000  | -7.725384000 |
| B          | -0.885842000 | -1.219257000 | -7.725384000 |
| B          | 0.885842000  | -1.219257000 | -7.725384000 |
| B          | 1.433323000  | 0.465715000  | -7.725384000 |
| B          | 0.000000000  | 1.507084000  | -7.725384000 |
| B          | -1.436396000 | -0.466713000 | -6.233856000 |
| B          | 0.000000000  | -1.510316000 | -6.233856000 |
| B          | 1.436396000  | -0.466713000 | -6.233856000 |
| B          | 0.887741000  | 1.221871000  | -6.233856000 |
| B          | -0.887741000 | 1.221871000  | -6.233856000 |
| C          | 0.000000000  | 0.000000000  | -5.415147000 |
| C          | 0.000000000  | 0.000000000  | -3.887512000 |
| B          | -1.434820000 | 0.466201000  | -3.068189000 |
| B          | -0.886768000 | -1.220531000 | -3.068189000 |
| B          | 0.886768000  | -1.220531000 | -3.068189000 |
| B          | 1.434820000  | 0.466201000  | -3.068189000 |
| B          | 0.000000000  | 1.508660000  | -3.068189000 |
| B          | -1.435406000 | -0.466392000 | -1.583556000 |
| B          | 0.000000000  | -1.509275000 | -1.583556000 |
| B          | 1.435406000  | -0.466392000 | -1.583556000 |
| B          | 0.887130000  | 1.221029000  | -1.583556000 |
| B          | -0.887130000 | 1.221029000  | -1.583556000 |
| C          | 0.000000000  | 0.000000000  | -0.763702000 |
| H          | -2.406853000 | 0.782034000  | -8.332541000 |
| H          | -1.487517000 | -2.047391000 | -8.332541000 |
| H          | 1.487517000  | -2.047391000 | -8.332541000 |
| H          | 2.406853000  | 0.782034000  | -8.332541000 |
| H          | 0.000000000  | 2.530715000  | -8.332541000 |
| H          | -2.407119000 | -0.782120000 | -5.632783000 |
| H          | 0.000000000  | -2.530995000 | -5.632783000 |
| H          | 2.407119000  | -0.782120000 | -5.632783000 |
| H          | 1.487681000  | 2.047618000  | -5.632783000 |
| H          | -1.487681000 | 2.047618000  | -5.632783000 |
| H          | -2.405052000 | 0.781449000  | -3.675456000 |
| H          | -1.486404000 | -2.045860000 | -3.675456000 |
| H          | 1.486404000  | -2.045860000 | -3.675456000 |
| H          | 2.405052000  | 0.781449000  | -3.675456000 |
| H          | 0.000000000  | 2.528822000  | -3.675456000 |
| H          | -2.403741000 | -0.781023000 | -0.972662000 |
| H          | 0.000000000  | -2.527443000 | -0.972662000 |
| H          | 2.403741000  | -0.781023000 | -0.972662000 |
| H          | 1.485594000  | 2.044745000  | -0.972662000 |
| H          | -1.485594000 | 2.044745000  | -0.972662000 |
| C          | 0.000000000  | 0.000000000  | 0.763702000  |
| B          | 1.435406000  | 0.466392000  | 1.583556000  |
| B          | 0.000000000  | 1.509275000  | 1.583556000  |
| B          | -1.435406000 | 0.466392000  | 1.583556000  |
| B          | -0.887130000 | -1.221029000 | 1.583556000  |
| B          | 0.887130000  | -1.221029000 | 1.583556000  |
| B          | 1.434820000  | -0.466201000 | 3.068189000  |
| B          | 0.886768000  | 1.220531000  | 3.068189000  |
| H          | 2.403741000  | 0.781023000  | 0.972662000  |
| B          | -0.886768000 | 1.220531000  | 3.068189000  |

|   |              |              |              |
|---|--------------|--------------|--------------|
| H | 0.000000000  | 2.527443000  | 0.972662000  |
| B | -1.434820000 | -0.466201000 | 3.068189000  |
| H | -2.403741000 | 0.781023000  | 0.972662000  |
| B | 0.000000000  | -1.508660000 | 3.068189000  |
| H | -1.485594000 | -2.044745000 | 0.972662000  |
| H | 1.485594000  | -2.044745000 | 0.972662000  |
| C | 0.000000000  | 0.000000000  | 3.887512000  |
| H | 2.405052000  | -0.781449000 | 3.675456000  |
| H | 1.486404000  | 2.045860000  | 3.675456000  |
| H | -1.486404000 | 2.045860000  | 3.675456000  |
| H | -2.405052000 | -0.781449000 | 3.675456000  |
| H | 0.000000000  | -2.528822000 | 3.675456000  |
| C | 0.000000000  | 0.000000000  | 5.415147000  |
| B | 1.436396000  | 0.466713000  | 6.233856000  |
| B | 0.000000000  | 1.510316000  | 6.233856000  |
| B | -1.436396000 | 0.466713000  | 6.233856000  |
| B | -0.887741000 | -1.221871000 | 6.233856000  |
| B | 0.887741000  | -1.221871000 | 6.233856000  |
| B | 1.433323000  | -0.465715000 | 7.725384000  |
| B | 0.885842000  | 1.219257000  | 7.725384000  |
| H | 2.407119000  | 0.782120000  | 5.632783000  |
| B | -0.885842000 | 1.219257000  | 7.725384000  |
| H | 0.000000000  | 2.530995000  | 5.632783000  |
| B | -1.433323000 | -0.465715000 | 7.725384000  |
| H | -2.407119000 | 0.782120000  | 5.632783000  |
| B | 0.000000000  | -1.507084000 | 7.725384000  |
| H | -1.487681000 | -2.047618000 | 5.632783000  |
| H | 1.487681000  | -2.047618000 | 5.632783000  |
| C | 0.000000000  | 0.000000000  | 8.513608000  |
| H | 2.406853000  | -0.782034000 | 8.332541000  |
| H | 1.487517000  | 2.047391000  | 8.332541000  |
| H | -1.487517000 | 2.047391000  | 8.332541000  |
| H | -2.406853000 | -0.782034000 | 8.332541000  |
| H | 0.000000000  | -2.530715000 | 8.332541000  |
| H | 0.000000000  | 0.000000000  | 9.600008000  |
| H | 0.000000000  | 0.000000000  | -9.600008000 |

112

5 B50C10H52

|   |              |              |              |
|---|--------------|--------------|--------------|
| C | 0.000000000  | 0.000000000  | 10.846798000 |
| B | -1.436060000 | -0.466604000 | 10.061531000 |
| B | -0.887534000 | 1.221586000  | 10.061531000 |
| B | 0.887534000  | 1.221586000  | 10.061531000 |
| B | 1.436060000  | -0.466604000 | 10.061531000 |
| B | 0.000000000  | -1.509963000 | 10.061531000 |
| B | -1.439180000 | 0.467618000  | 8.571992000  |
| B | 0.000000000  | 1.513244000  | 8.571992000  |
| B | 1.439180000  | 0.467618000  | 8.571992000  |
| B | 0.889462000  | -1.224240000 | 8.571992000  |
| B | -0.889462000 | -1.224240000 | 8.571992000  |
| C | 0.000000000  | 0.000000000  | 7.751038000  |
| C | 0.000000000  | 0.000000000  | 6.224591000  |
| B | -1.437069000 | -0.466932000 | 5.400944000  |
| B | -0.888157000 | 1.222444000  | 5.400944000  |
| B | 0.888157000  | 1.222444000  | 5.400944000  |
| B | 1.437069000  | -0.466932000 | 5.400944000  |
| B | 0.000000000  | -1.511023000 | 5.400944000  |
| B | -1.437119000 | 0.466948000  | 3.916047000  |
| B | 0.000000000  | 1.511076000  | 3.916047000  |
| B | 1.437119000  | 0.466948000  | 3.916047000  |
| B | 0.888188000  | -1.222486000 | 3.916047000  |
| B | -0.888188000 | -1.222486000 | 3.916047000  |
| C | 0.000000000  | 0.000000000  | -6.224591000 |
| H | -2.400661000 | -0.780022000 | 10.677176000 |
| H | -1.483690000 | 2.042124000  | 10.677176000 |
| H | 1.483690000  | 2.042124000  | 10.677176000 |
| H | 2.400661000  | -0.780022000 | 10.677176000 |
| H | 0.000000000  | -2.524204000 | 10.677176000 |
| H | -2.404579000 | 0.781295000  | 7.961672000  |

|   |              |              |               |
|---|--------------|--------------|---------------|
| H | 0.000000000  | 2.528323000  | 7.961672000   |
| H | 2.404579000  | 0.781295000  | 7.961672000   |
| H | 1.486111000  | -2.045457000 | 7.961672000   |
| H | -1.486111000 | -2.045457000 | 7.961672000   |
| H | -2.404101000 | -0.781140000 | 6.008683000   |
| H | -1.485816000 | 2.045050000  | 6.008683000   |
| H | 1.485816000  | 2.045050000  | 6.008683000   |
| H | 2.404101000  | -0.781140000 | 6.008683000   |
| H | 0.000000000  | -2.527821000 | 6.008683000   |
| H | -2.404808000 | 0.781370000  | 3.309550000   |
| H | 0.000000000  | 2.528565000  | 3.309550000   |
| H | 2.404808000  | 0.781370000  | 3.309550000   |
| H | 1.486253000  | -2.045652000 | 3.309550000   |
| H | -1.486253000 | -2.045652000 | 3.309550000   |
| C | 0.000000000  | 0.000000000  | -7.751038000  |
| B | 1.439180000  | -0.467618000 | -8.571992000  |
| B | 0.000000000  | -1.513244000 | -8.571992000  |
| B | -1.439180000 | -0.467618000 | -8.571992000  |
| B | -0.889462000 | 1.224240000  | -8.571992000  |
| B | 0.889462000  | 1.224240000  | -8.571992000  |
| B | 1.436060000  | 0.466604000  | -10.061531000 |
| B | 0.887534000  | -1.221586000 | -10.061531000 |
| H | 2.404579000  | -0.781295000 | -7.961672000  |
| B | -0.887534000 | -1.221586000 | -10.061531000 |
| H | 0.000000000  | -2.528323000 | -7.961672000  |
| B | -1.436060000 | 0.466604000  | -10.061531000 |
| H | -2.404579000 | -0.781295000 | -7.961672000  |
| B | 0.000000000  | 1.509963000  | -10.061531000 |
| H | -1.486111000 | 2.045457000  | -7.961672000  |
| H | 1.486111000  | 2.045457000  | -7.961672000  |
| C | 0.000000000  | 0.000000000  | -10.846798000 |
| H | 2.400661000  | 0.780022000  | -10.677176000 |
| H | 1.483690000  | -2.042124000 | -10.677176000 |
| H | -1.483690000 | -2.042124000 | -10.677176000 |
| H | -2.400661000 | 0.780022000  | -10.677176000 |
| H | 0.000000000  | 2.524204000  | -10.677176000 |
| H | 0.000000000  | 0.000000000  | 11.932556000  |
| C | 0.000000000  | 0.000000000  | 3.092315000   |
| C | 0.000000000  | 0.000000000  | 1.566304000   |
| B | 1.436811000  | -0.466848000 | 0.742160000   |
| B | 0.000000000  | -1.510752000 | 0.742160000   |
| B | -1.436811000 | -0.466848000 | 0.742160000   |
| B | -0.887998000 | 1.222224000  | 0.742160000   |
| B | 0.887998000  | 1.222224000  | 0.742160000   |
| B | 1.436811000  | 0.466848000  | -0.742160000  |
| B | 0.887998000  | -1.222224000 | -0.742160000  |
| H | 2.403629000  | -0.780986000 | 1.349931000   |
| B | -0.887998000 | -1.222224000 | -0.742160000  |
| H | 0.000000000  | -2.527325000 | 1.349931000   |
| B | -1.436811000 | 0.466848000  | -0.742160000  |
| H | -2.403629000 | -0.780986000 | 1.349931000   |
| B | 0.000000000  | 1.510752000  | -0.742160000  |
| H | -1.485525000 | 2.044649000  | 1.349931000   |
| H | 1.485525000  | 2.044649000  | 1.349931000   |
| C | 0.000000000  | 0.000000000  | -1.566304000  |
| H | 2.403629000  | 0.780986000  | -1.349931000  |
| H | 1.485525000  | -2.044649000 | -1.349931000  |
| H | -1.485525000 | -2.044649000 | -1.349931000  |
| H | -2.403629000 | 0.780986000  | -1.349931000  |
| H | 0.000000000  | 2.527325000  | -1.349931000  |
| C | 0.000000000  | 0.000000000  | -3.092315000  |
| B | 1.437119000  | -0.466948000 | -3.916047000  |
| B | 0.000000000  | -1.511076000 | -3.916047000  |
| B | -1.437119000 | -0.466948000 | -3.916047000  |
| B | -0.888188000 | 1.222486000  | -3.916047000  |
| B | 0.888188000  | 1.222486000  | -3.916047000  |
| B | 1.437069000  | 0.466932000  | -5.400944000  |
| B | 0.888157000  | -1.222444000 | -5.400944000  |

|   |              |              |               |
|---|--------------|--------------|---------------|
| H | 2.404808000  | -0.781370000 | -3.309550000  |
| B | -0.888157000 | -1.222444000 | -5.400944000  |
| H | 0.000000000  | -2.528565000 | -3.309550000  |
| B | -1.437069000 | 0.466932000  | -5.400944000  |
| H | -2.404808000 | -0.781370000 | -3.309550000  |
| B | 0.000000000  | 1.511023000  | -5.400944000  |
| H | -1.486253000 | 2.045652000  | -3.309550000  |
| H | 1.486253000  | 2.045652000  | -3.309550000  |
| H | 2.404101000  | 0.781140000  | -6.008683000  |
| H | 1.485816000  | -2.045050000 | -6.008683000  |
| H | -1.485816000 | -2.045050000 | -6.008683000  |
| H | -2.404101000 | 0.781140000  | -6.008683000  |
| H | 0.000000000  | 2.527821000  | -6.008683000  |
| H | 0.000000000  | 0.000000000  | -11.932556000 |

134

6 B60C12H62

|   |              |              |              |
|---|--------------|--------------|--------------|
| C | 0.000000000  | 0.000000000  | 13.171104000 |
| B | -1.435769000 | -0.466510000 | 12.387280000 |
| B | -0.887354000 | 1.221338000  | 12.387280000 |
| B | 0.887354000  | 1.221338000  | 12.387280000 |
| B | 1.435769000  | -0.466510000 | 12.387280000 |
| B | 0.000000000  | -1.509657000 | 12.387280000 |
| B | -1.438696000 | 0.467461000  | 10.896115000 |
| B | 0.000000000  | 1.512734000  | 10.896115000 |
| B | 1.438696000  | 0.467461000  | 10.896115000 |
| B | 0.889163000  | -1.223828000 | 10.896115000 |
| B | -0.889163000 | -1.223828000 | 10.896115000 |
| C | 0.000000000  | 0.000000000  | 10.078189000 |
| C | 0.000000000  | 0.000000000  | 8.552050000  |
| B | -1.436276000 | -0.466674000 | 7.731169000  |
| B | -0.887667000 | 1.221769000  | 7.731169000  |
| B | 0.887667000  | 1.221769000  | 7.731169000  |
| B | 1.436276000  | -0.466674000 | 7.731169000  |
| B | 0.000000000  | -1.510190000 | 7.731169000  |
| B | -1.436916000 | 0.466882000  | 6.245524000  |
| B | 0.000000000  | 1.510863000  | 6.245524000  |
| B | 1.436916000  | 0.466882000  | 6.245524000  |
| B | 0.888063000  | -1.222314000 | 6.245524000  |
| B | -0.888063000 | -1.222314000 | 6.245524000  |
| C | 0.000000000  | 0.000000000  | -3.891865000 |
| H | -2.400889000 | -0.780096000 | 13.002813000 |
| H | -1.483831000 | 2.042318000  | 13.002813000 |
| H | 1.483831000  | 2.042318000  | 13.002813000 |
| H | 2.400889000  | -0.780096000 | 13.002813000 |
| H | 0.000000000  | -2.524444000 | 13.002813000 |
| H | -2.404608000 | 0.781304000  | 10.286351000 |
| H | 0.000000000  | 2.528354000  | 10.286351000 |
| H | 2.404608000  | 0.781304000  | 10.286351000 |
| H | 1.486129000  | -2.045482000 | 10.286351000 |
| H | -1.486129000 | -2.045482000 | 10.286351000 |
| H | -2.403726000 | -0.781018000 | 8.338702000  |
| H | -1.485584000 | 2.044731000  | 8.338702000  |
| H | 1.485584000  | 2.044731000  | 8.338702000  |
| H | 2.403726000  | -0.781018000 | 8.338702000  |
| H | 0.000000000  | -2.527427000 | 8.338702000  |
| H | -2.403533000 | 0.780955000  | 5.637518000  |
| H | 0.000000000  | 2.527224000  | 5.637518000  |
| H | 2.403533000  | 0.780955000  | 5.637518000  |
| H | 1.485465000  | -2.044567000 | 5.637518000  |
| H | -1.485465000 | -2.044567000 | 5.637518000  |
| C | 0.000000000  | 0.000000000  | -5.421362000 |
| B | 1.436916000  | -0.466882000 | -6.245524000 |
| B | 0.000000000  | -1.510863000 | -6.245524000 |
| B | -1.436916000 | -0.466882000 | -6.245524000 |
| B | -0.888063000 | 1.222314000  | -6.245524000 |
| B | 0.888063000  | 1.222314000  | -6.245524000 |
| B | 1.436276000  | 0.466674000  | -7.731169000 |
| B | 0.887667000  | -1.221769000 | -7.731169000 |

|   |              |              |               |
|---|--------------|--------------|---------------|
| H | 2.403533000  | -0.780955000 | -5.637518000  |
| B | -0.887667000 | -1.221769000 | -7.731169000  |
| H | 0.000000000  | -2.527224000 | -5.637518000  |
| B | -1.436276000 | 0.466674000  | -7.731169000  |
| H | -2.403533000 | -0.780955000 | -5.637518000  |
| B | 0.000000000  | 1.510190000  | -7.731169000  |
| H | -1.485465000 | 2.044567000  | -5.637518000  |
| H | 1.485465000  | 2.044567000  | -5.637518000  |
| C | 0.000000000  | 0.000000000  | -8.552050000  |
| H | 2.403726000  | 0.781018000  | -8.338702000  |
| H | 1.485584000  | -2.044731000 | -8.338702000  |
| H | -1.485584000 | -2.044731000 | -8.338702000  |
| H | -2.403726000 | 0.781018000  | -8.338702000  |
| H | 0.000000000  | 2.527427000  | -8.338702000  |
| C | 0.000000000  | 0.000000000  | -10.078189000 |
| B | 1.438696000  | -0.467461000 | -10.896115000 |
| B | 0.000000000  | -1.512734000 | -10.896115000 |
| B | -1.438696000 | -0.467461000 | -10.896115000 |
| B | -0.889163000 | 1.223828000  | -10.896115000 |
| B | 0.889163000  | 1.223828000  | -10.896115000 |
| B | 1.435769000  | 0.466510000  | -12.387280000 |
| B | 0.887354000  | -1.221338000 | -12.387280000 |
| H | 2.404608000  | -0.781304000 | -10.286351000 |
| B | -0.887354000 | -1.221338000 | -12.387280000 |
| H | 0.000000000  | -2.528354000 | -10.286351000 |
| B | -1.435769000 | 0.466510000  | -12.387280000 |
| H | -2.404608000 | -0.781304000 | -10.286351000 |
| B | 0.000000000  | 1.509657000  | -12.387280000 |
| H | -1.486129000 | 2.045482000  | -10.286351000 |
| H | 1.486129000  | 2.045482000  | -10.286351000 |
| C | 0.000000000  | 0.000000000  | -13.171104000 |
| H | 2.400889000  | 0.780096000  | -13.002813000 |
| H | 1.483831000  | -2.042318000 | -13.002813000 |
| H | -1.483831000 | -2.042318000 | -13.002813000 |
| H | -2.400889000 | 0.780096000  | -13.002813000 |
| H | 0.000000000  | 2.524444000  | -13.002813000 |
| H | 0.000000000  | 0.000000000  | -14.256627000 |
| H | 0.000000000  | 0.000000000  | 14.256627000  |
| C | 0.000000000  | 0.000000000  | 5.421362000   |
| C | 0.000000000  | 0.000000000  | 3.891865000   |
| B | 1.437167000  | -0.466964000 | 3.066091000   |
| B | 0.000000000  | -1.511127000 | 3.066091000   |
| B | -1.437167000 | -0.466964000 | 3.066091000   |
| B | -0.888218000 | 1.222527000  | 3.066091000   |
| B | 0.888218000  | 1.222527000  | 3.066091000   |
| B | 1.436351000  | 0.466699000  | 1.580970000   |
| B | 0.887713000  | -1.221833000 | 1.580970000   |
| H | 2.404740000  | -0.781348000 | 3.672114000   |
| B | -0.887713000 | -1.221833000 | 1.580970000   |
| H | 0.000000000  | -2.528494000 | 3.672114000   |
| B | -1.436351000 | 0.466699000  | 1.580970000   |
| H | -2.404740000 | -0.781348000 | 3.672114000   |
| B | 0.000000000  | 1.510268000  | 1.580970000   |
| H | -1.486211000 | 2.045594000  | 3.672114000   |
| H | 1.486211000  | 2.045594000  | 3.672114000   |
| C | 0.000000000  | 0.000000000  | 0.760766000   |
| H | 2.403468000  | 0.780934000  | 0.973326000   |
| H | 1.485425000  | -2.044512000 | 0.973326000   |
| H | -1.485425000 | -2.044512000 | 0.973326000   |
| H | -2.403468000 | 0.780934000  | 0.973326000   |
| H | 0.000000000  | 2.527156000  | 0.973326000   |
| C | 0.000000000  | 0.000000000  | -0.760766000  |
| B | 1.436351000  | -0.466699000 | -1.580970000  |
| B | 0.000000000  | -1.510268000 | -1.580970000  |
| B | -1.436351000 | -0.466699000 | -1.580970000  |
| B | -0.887713000 | 1.221833000  | -1.580970000  |
| B | 0.887713000  | 1.221833000  | -1.580970000  |
| B | 1.437167000  | 0.466964000  | -3.066091000  |

|                  |              |              |              |
|------------------|--------------|--------------|--------------|
| B                | 0.888218000  | -1.222527000 | -3.066091000 |
| H                | 2.403468000  | -0.780934000 | -0.973326000 |
| B                | -0.888218000 | -1.222527000 | -3.066091000 |
| H                | 0.000000000  | -2.527156000 | -0.973326000 |
| B                | -1.437167000 | 0.466964000  | -3.066091000 |
| H                | -2.403468000 | -0.780934000 | -0.973326000 |
| B                | 0.000000000  | 1.511127000  | -3.066091000 |
| H                | -1.485425000 | 2.044512000  | -0.973326000 |
| H                | 1.485425000  | 2.044512000  | -0.973326000 |
| H                | 2.404740000  | 0.781348000  | -3.672114000 |
| H                | 1.486211000  | -2.045594000 | -3.672114000 |
| H                | -1.486211000 | -2.045594000 | -3.672114000 |
| H                | -2.404740000 | 0.781348000  | -3.672114000 |
| H                | 0.000000000  | 2.528494000  | -3.672114000 |
| 90               |              |              |              |
| Zig-Zag B40C8H42 |              |              |              |
| B                | 4.839730000  | 1.135168000  | -5.504168000 |
| C                | 3.354184000  | 1.200572000  | -6.339819000 |
| B                | 4.017524000  | -0.342205000 | -5.746413000 |
| B                | 4.918296000  | -0.015998000 | -4.244178000 |
| B                | 4.812571000  | 1.733665000  | -3.906135000 |
| B                | 3.844700000  | 2.486779000  | -5.205282000 |
| B                | 2.324479000  | 0.062149000  | -5.472298000 |
| B                | 3.288878000  | -0.684502000 | -4.175657000 |
| B                | 3.779883000  | 0.595592000  | -3.042591000 |
| B                | 3.116747000  | 2.143968000  | -3.636108000 |
| B                | 2.216133000  | 1.811135000  | -5.143047000 |
| C                | 2.267543000  | 0.671109000  | -3.849710000 |
| B                | -0.526958000 | 0.327589000  | -3.874562000 |
| B                | -1.729398000 | 0.984314000  | -2.748752000 |
| B                | -1.516411000 | -0.775741000 | -2.901828000 |
| B                | 0.205410000  | -1.100753000 | -3.134646000 |
| C                | 0.988188000  | 0.441301000  | -3.043762000 |
| B                | -0.133952000 | 1.744509000  | -2.880123000 |
| B                | -1.719146000 | -0.041545000 | -1.308815000 |
| B                | -0.523838000 | -1.330767000 | -1.543734000 |
| B                | 1.061692000  | -0.578100000 | -1.680138000 |
| B                | 0.848058000  | 1.194957000  | -1.526272000 |
| B                | -0.872015000 | 1.517493000  | -1.301665000 |
| C                | -0.125676000 | 0.100088000  | -0.657533000 |
| H                | 3.309180000  | 1.418291000  | -7.504842000 |
| H                | 4.414577000  | -1.154198000 | -6.514728000 |
| H                | 5.916673000  | -0.608336000 | -4.006431000 |
| H                | 5.741145000  | 2.309198000  | -3.447543000 |
| H                | 4.129047000  | 3.564188000  | -5.612134000 |
| H                | 1.396020000  | -0.514597000 | -5.920066000 |
| H                | 3.006820000  | -1.754700000 | -3.756007000 |
| H                | 3.821174000  | 0.385618000  | -1.877670000 |
| H                | 2.712879000  | 2.950070000  | -2.868311000 |
| H                | 1.215476000  | 2.395891000  | -5.373302000 |
| H                | -2.707624000 | 1.546054000  | -3.119791000 |
| H                | -2.334848000 | -1.482040000 | -3.390645000 |
| H                | 0.689678000  | -1.953790000 | -3.791831000 |
| H                | 0.118335000  | 2.793095000  | -3.365163000 |
| H                | -2.628576000 | -0.223274000 | -0.572217000 |
| H                | -0.602584000 | -2.364085000 | -0.972373000 |
| H                | 2.066443000  | -1.036376000 | -1.270672000 |
| H                | 1.724127000  | 1.800339000  | -1.025872000 |
| H                | -1.194132000 | 2.383904000  | -0.565273000 |
| H                | 5.744245000  | 1.300598000  | -6.082711000 |
| H                | -0.544296000 | 0.437049000  | -5.053558000 |
| B                | -4.839730000 | -1.135168000 | 5.504168000  |
| C                | -3.354184000 | -1.200572000 | 6.339819000  |
| B                | -4.017524000 | 0.342205000  | 5.746413000  |
| B                | -4.918296000 | 0.015998000  | 4.244178000  |
| B                | -4.812571000 | -1.733665000 | 3.906135000  |
| B                | -3.844700000 | -2.486779000 | 5.205282000  |
| B                | -2.324479000 | -0.062149000 | 5.472298000  |

|   |              |              |             |
|---|--------------|--------------|-------------|
| B | -3.288878000 | 0.684502000  | 4.175657000 |
| B | -3.779883000 | -0.595592000 | 3.042591000 |
| B | -3.116747000 | -2.143968000 | 3.636108000 |
| B | -2.216133000 | -1.811135000 | 5.143047000 |
| C | -2.267543000 | -0.671109000 | 3.849710000 |
| B | 0.526958000  | -0.327589000 | 3.874562000 |
| B | 1.729398000  | -0.984314000 | 2.748752000 |
| B | 1.516411000  | 0.775741000  | 2.901828000 |
| B | -0.205410000 | 1.100753000  | 3.134646000 |
| C | -0.988188000 | -0.441301000 | 3.043762000 |
| B | 0.133952000  | -1.744509000 | 2.880123000 |
| B | 1.719146000  | 0.041545000  | 1.308815000 |
| B | 0.523838000  | 1.330767000  | 1.543734000 |
| B | -1.061692000 | 0.578100000  | 1.680138000 |
| B | -0.848058000 | -1.194957000 | 1.526272000 |
| B | 0.872015000  | -1.517493000 | 1.301665000 |
| C | 0.125676000  | -0.100088000 | 0.657533000 |
| H | -3.309180000 | -1.418291000 | 7.504842000 |
| H | -4.414577000 | 1.154198000  | 6.514728000 |
| H | -5.916673000 | 0.608336000  | 4.006431000 |
| H | -5.741145000 | -2.309198000 | 3.447543000 |
| H | -4.129047000 | -3.564188000 | 5.612134000 |
| H | -1.396020000 | 0.514597000  | 5.920066000 |
| H | -3.006820000 | 1.754700000  | 3.756007000 |
| H | -3.821174000 | -0.385618000 | 1.877670000 |
| H | -2.712879000 | -2.950070000 | 2.868311000 |
| H | -1.215476000 | -2.395891000 | 5.373302000 |
| H | 2.707624000  | -1.546054000 | 3.119791000 |
| H | 2.334848000  | 1.482040000  | 3.390645000 |
| H | -0.689678000 | 1.953790000  | 3.791831000 |
| H | -0.118335000 | -2.793095000 | 3.365163000 |
| H | 2.628576000  | 0.223274000  | 0.572217000 |
| H | 0.602584000  | 2.364085000  | 0.972373000 |
| H | -2.066443000 | 1.036376000  | 1.270672000 |
| H | -1.724127000 | -1.800339000 | 1.025872000 |
| H | 1.194132000  | -2.383904000 | 0.565273000 |
| H | -5.744245000 | -1.300598000 | 6.082711000 |
| H | 0.544296000  | -0.437049000 | 5.053558000 |
